# Supplementary material for: High-efficiency enrichment enables identification of aptamers to circulating Plasmodium falciparum-infected erythrocytes
Source: PubMed Central journal article supplement (PMC7298056; doi:10.1038/s41598-020-66537-1), 2020-06-16
Supplement: 41598_2020_66537_MOESM1_ESM.pdf [file 41598_2020_66537_MOESM1_ESM.pdf]

## Supplementary Information

High-efficiency enrichment enables identification of aptamers to circulating *Plasmodium falciparum*-infected erythrocytes

Eugene K. Oteng<sup>1\*</sup>, Wenjuan Gu<sup>2</sup>, Maureen McKeague<sup>3,4</sup>

<sup>1</sup>Laboratory of Malaria and Vector Research, National Institute of Allergy and Infectious Diseases, National Institutes of Health, Rockville, Maryland, 20852 USA.

<sup>2</sup> Clinical Research Directorate/Clinical Monitoring Research Program, Leidos Biomedical Research, Inc., Frederick National Laboratory for Cancer Research, Frederick, Maryland, 21702 USA.

<sup>3</sup> Department of Pharmacology and Therapeutics, McGill University, 3655 Prom. Sir-William-Osler, Montreal, Quebec H3G 1Y6, Canada

<sup>4</sup> Department of Chemistry, McGill University, 801 Sherbrooke Street West, Montreal, Quebec H3A 0B8, Canada

**p. 2 Table S1. Sequences of selected aptamers.**

**p. 3 Table S2. Profile of literature analyzed.**

**p. 4 Table S3. Univariate comparison of methods used in 43 SELEX publications by number of rounds.**

**p. 5 Figure S1. Box plot comparing the estimated number of sequences in the initial library (i.e. library size) for selection experiments incorporating alkaline treatment or other single-strand generating methods.**

**p. 6 Figure S2. Box plot comparing size of the random region in the library used for selection experiments incorporating alkaline treatment or other single-strand generating methods.**

**Note: Supplementary files with the reads from alkaline and lambda SELEX are available online.**

**Supplementary Table S4 contains curated data from the Aptamer Base and from the literature as described in Table S2. Available online as a downloadable .xlsx spreadsheet.**

|        | Grouping  | Sequences of random region                     | Read Count*                                   |
|--------|-----------|------------------------------------------------|-----------------------------------------------|
| Lambda | Malaria.1 | CCAAACGCGCTGGTTTGG AATGCTTAGAGTTTGATCGATGCCTAA | 40640                                         |
|        | Malaria.2 | GTGCAGACAGCTAGTAGTGGT GACTTTCTGTCCAAATCAAGATAA | 1786                                          |
|        | Malaria.3 | CACTAGGATCTAGGGAAAAATCTCGTAAATACTATACTCCTGAGC  | 938                                           |
|        | --        | ACGTTTTAGCTACACGTGCGGGCAGTACCCTCACTGGGAAACAAC  | 444                                           |
|        | --        | ATAGCCCGACTATATCGGCAATACTGTGCTGGATCTTCAGGGT    | 326                                           |
|        | --        | TAGCTGAGTTGTACTCGGATGTGTAGGTTTTTAGGCTAGTAATCA  | 271                                           |
|        | --        | ATAAAAAGCAGGTGGCCTTGTGATTGGATTTATATTGAAAGTACA  | 261                                           |
|        | --        | GTGCAGACAGCTAGTAGTGGT GACTTTCTGTCCAAATCAAGATGA | 243                                           |
|        | --        | GTGCGGACAGCTAGTAGTGGT GACTTTCTGTCCAAATCAAGATAA | 228                                           |
|        | --        | CCGCTGCAGACGCGCAAGTGAGATCTGTTCTTTATTGTATG      | 227                                           |
|        | Alkaline  | Malaria.3                                      | CACTAGGATCTAGGGAAAAATCTCGTAAATACTATACTCCTGAGC |
| --     |           | TAATGGTGTATTGTTGACTGTTTCGCATCGCCTTTAGCTCCGAGCC | 16                                            |
| --     |           | CAAGTAGAACGATCAAATAAGATAAAAAGCCTTTTTAAAGCTTA   | 15                                            |
| --     |           | AAGATGAGGCATTTGTATCGATAAAACCGCGTATGACGGTTCCTA  | 15                                            |
| --     |           | TTAGCCTGGCCAAGTTTGTTGTAAATGTGATAATTCGTTTCGAGC  | 11                                            |
| --     |           | CGCGGAAATATCGAATAATGAGGATGAGTGAGTTAAGATGGTGAA  | 11                                            |
| --     |           | GCAGGGTGCTTTAACGTGCCTATACGTTTCGTATCGCCTTATCTTT | 11                                            |
| --     |           | AGGTA ACTTGCGGTCAATAGAAGGGTGGATTAATGTACGATCTCA | 11                                            |
| --     |           | TGCGTGGTTGCCTAGGCTCTAGGGAACCCTAGTCTCATTATATGC  | 11                                            |
| --     |           | TTCGCTCACGGGGTCTACGCGTACCGGACAATTTTGCTTCACATG  | 10                                            |

\*Total reads analyzed from lambda and alkaline SELEX were 378,439 and 965,748 respectively

**Table S1. Sequences of selected aptamers.**

**Table S2. Profile of literature analyzed.**

| <b>No. of Papers</b> | <b>Condition</b>                                                                                                                                                                                                                                                                                                                                                                                                                                                                                                                                                                                                                     |
|----------------------|--------------------------------------------------------------------------------------------------------------------------------------------------------------------------------------------------------------------------------------------------------------------------------------------------------------------------------------------------------------------------------------------------------------------------------------------------------------------------------------------------------------------------------------------------------------------------------------------------------------------------------------|
| 492                  | All SELEX experiments from 1990 to 2013 reporting $K_d$ values (Ref: <a href="http://www.ncbi.nlm.nih.gov/pubmed/26530075">http://www.ncbi.nlm.nih.gov/pubmed/26530075</a> )<br>325 papers performing SELEX with RNA, dsDNA, or modified nucleic acids<br>23 papers with incomplete data (e.g. did not report the number of rounds or single-strand recovery method)<br>41 papers using Capillary Electrophoresis-SELEX, Automated SELEX, Non-SELEX or Microfluidic SELEX<br>42 papers that selected for small molecule targets<br>1 paper retracted<br>17 papers describing SELEX experiments of intermediate length (11-14 rounds) |
| 43                   | Analyzed                                                                                                                                                                                                                                                                                                                                                                                                                                                                                                                                                                                                                             |

**Table S3. Univariate comparison of methods used in 43 SELEX publications by number of rounds.**

| <b>Characteristics</b>           | <b>Efficient (<math>\leq 10</math> rounds)<br/>N=30</b> | <b>Inefficient (<math>\geq 15</math> rounds)<br/>N=13</b> | <b>p-value*</b> |
|----------------------------------|---------------------------------------------------------|-----------------------------------------------------------|-----------------|
| Alkaline use                     | 9 (30.0%)                                               | 12 (92.3%)                                                | 0.0002          |
| Average $K_d$ (M) : mean (range) | 3.4e-07<br>(2.1e-11 – 5.5e-06)                          | 4.3e-07<br>(1.3e-08 - 2.9e-06)                            | 0.6061          |
| Target type                      |                                                         |                                                           |                 |
| Cells                            | 2 (6.7%)                                                | 5 (38.5%)                                                 | 0.0188          |
| Protein                          | 22 (73.3%)                                              | 8 (61.5%)                                                 |                 |
| Other                            | 6 (20.0%)                                               | 0 (0.0%)                                                  |                 |
| Partitioning method              |                                                         |                                                           |                 |
| Affinity chromatography          | 21 (70%)                                                | 5 (38.5%)                                                 | 0.0053          |
| Centrifugation and cell wash     | 1 (3.3%)                                                | 6 (46.2%)                                                 |                 |
| Filtration                       | 6 (20.0%)                                               | 2 (15.4%)                                                 |                 |
| Year (range)                     | 2007 (1992-2001)                                        | 2006 (1990-2011)                                          | 0.9468          |

\* Fisher's exact test for categorical variables; Wilcoxon rank sum test for numerical variables

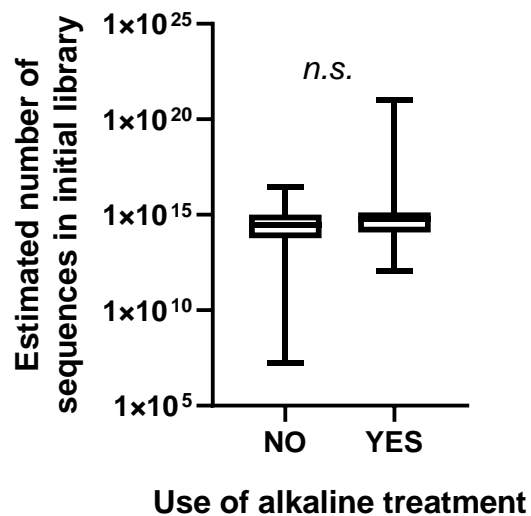

Figure S1. Box plot comparing the estimated number of sequences in the initial library (i.e. library size) for selection experiments incorporating alkaline treatment or other single-strand generating methods. Data was curated from the literature as described in Table S2. Values for each experiment are available in Table S4. Most publications did not provide the estimates, so we calculated the number of sequences based on the experimental conditions. No significant difference was observed.

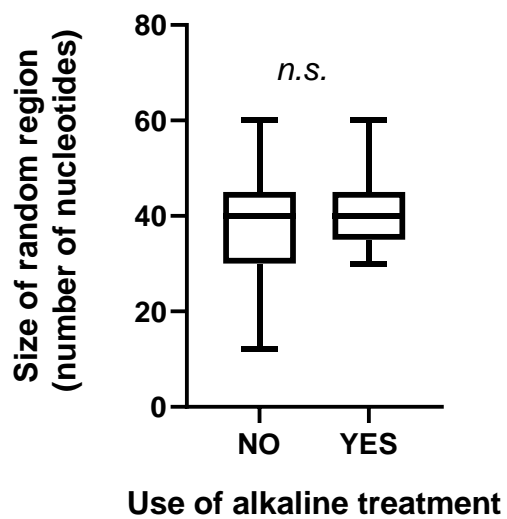

Figure S2. Box plot comparing size of the random region in the library used for selection experiments incorporating alkaline treatment or other single-strand generating methods. Data was curated from the literature as described in Table S2. Values for each experiment are available in Table S4. No significant difference was observed.
